# Supplementary material for: Stabilized Cu0 -Cu1+ dual sites in a cyanamide framework for selective CO2 electroreduction to ethylene
Source: PubMed Central journal article supplement — Nat Commun. 2024 Sep 7;15:7820. doi: 10.1038/s41467-024-52022-0 (PMC11379946; doi:10.1038/s41467-024-52022-0), 2024-09-07
Supplement: 41467_2024_52022_MOESM1_ESM.pdf [file 41467_2024_52022_MOESM1_ESM.pdf]

## Supplementary Information

### Stabilized Cu<sup>0</sup>-Cu<sup>1+</sup> Dual Sites in a Cyanamide Framework for Selective CO<sub>2</sub>

#### Electroreduction to Ethylene

Kaihang Yue <sup>1,2,6</sup>, Yanyang Qin <sup>3,6</sup>, Honghao Huang <sup>1</sup>, Zhuoran Lv <sup>1,4</sup>, Mingzhi Cai <sup>4,5</sup>, Yaqiong Su <sup>3\*</sup>,

Fuqiang Huang <sup>1,4,\*</sup>, and Ya Yan <sup>1,2,\*</sup>

<sup>1</sup> State Key Laboratory of High Performance Ceramics and Superfine Microstructure, Shanghai Institute of Ceramics, Chinese Academy of Sciences, Shanghai 200050, China.

<sup>2</sup> Center of Materials Science and Optoelectronics Engineering, University of Chinese Academy of Sciences, Beijing 100049, China.

<sup>3</sup> School of Chemistry, Xi'an Jiaotong University, Xi'an 710049, China

<sup>4</sup> State Key Lab of Metal Matrix Composites, School of Materials Science and Engineering, Shanghai Jiao Tong University, Shanghai 200240, China

<sup>5</sup> State Key Laboratory of Rare Earth Materials Chemistry and Applications College of Chemistry and Molecular Engineering, Peking University, Beijing 100871, China

<sup>6</sup> These authors contributed equally: Kaihang Yue, Yanyang Qin.

Corresponding author E-mail: [yqsu1989@xjtu.edu.cn](mailto:yqsu1989@xjtu.edu.cn) (YQS), [huangfq@sjtu.edu.cn](mailto:huangfq@sjtu.edu.cn) (FQH), [yanya@mail.sic.ac.cn](mailto:yanya@mail.sic.ac.cn) (YY)

## Supplementary Figures

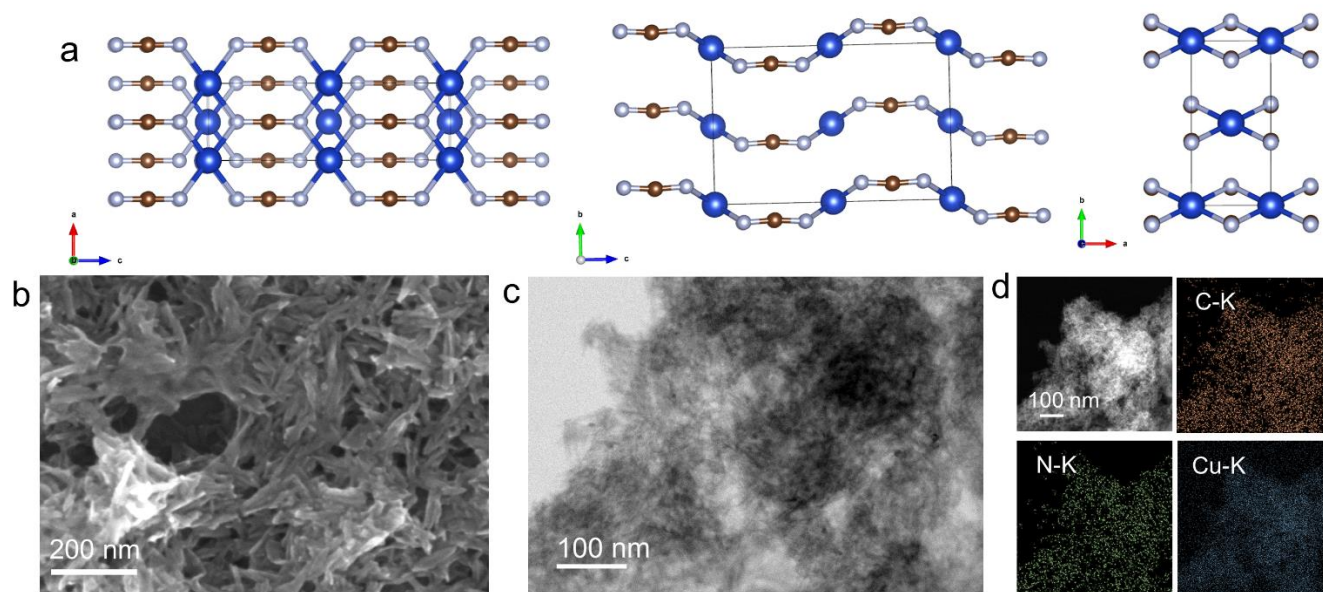

**Supplementary Fig. 1. The structural model and electron microscopy images of CuNCN.** (a) Crystal structure of CuNCN. (b) SEM, (c) TEM image of CuNCN. (d) EDS mapping of CuNCN.

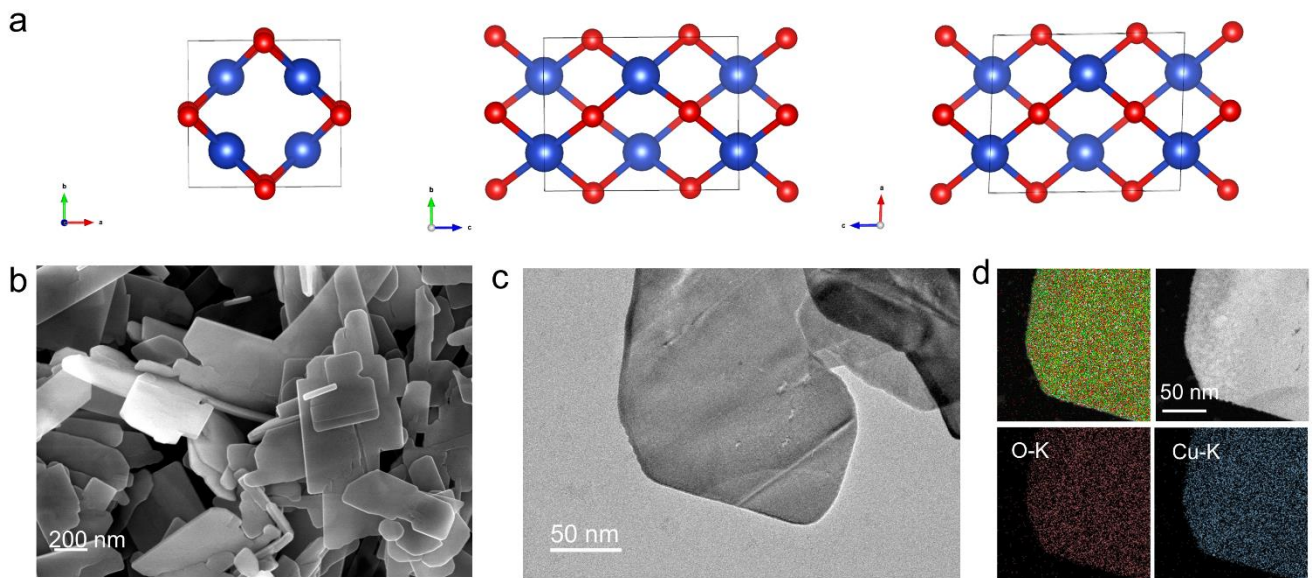

**Supplementary Fig. 2. The structural model and electron microscopy images of CuO.** (a) Crystal structure of CuO. (b) SEM, (c) TEM image of CuO. (d) EDS mapping of CuO.

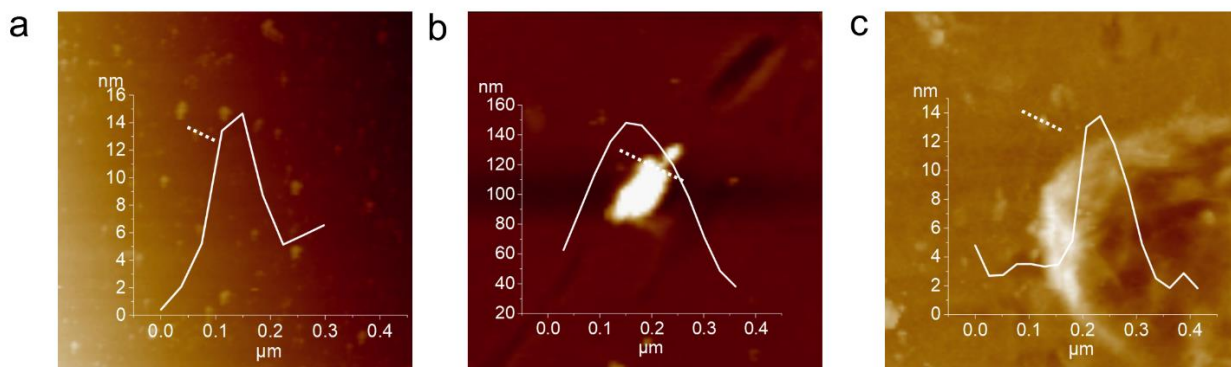

**Supplementary Fig. 3.** AFM image of (a)  $\text{Cu}^{\delta+}\text{NCN}$ , (b)  $\text{CuNCN}$  and (c)  $\text{CuO}$ .

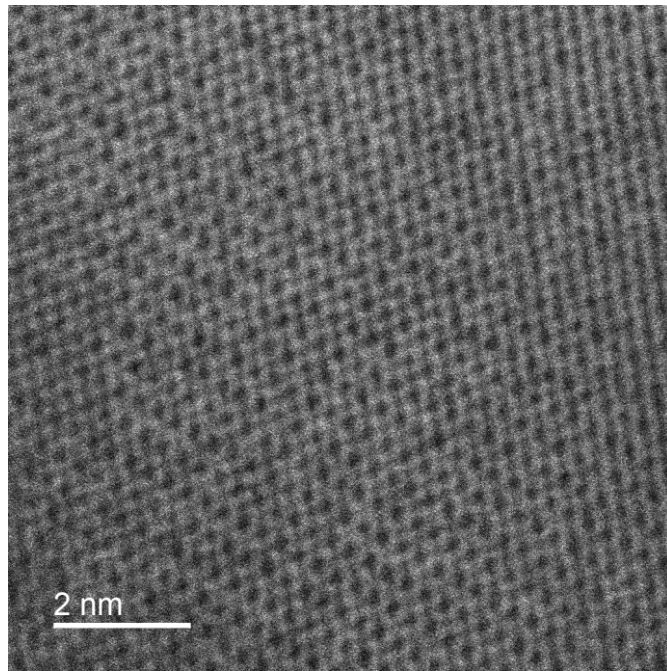

**Supplementary Fig. 4.** ABF image of Cu<sup>δ+</sup>NCN in STEM.

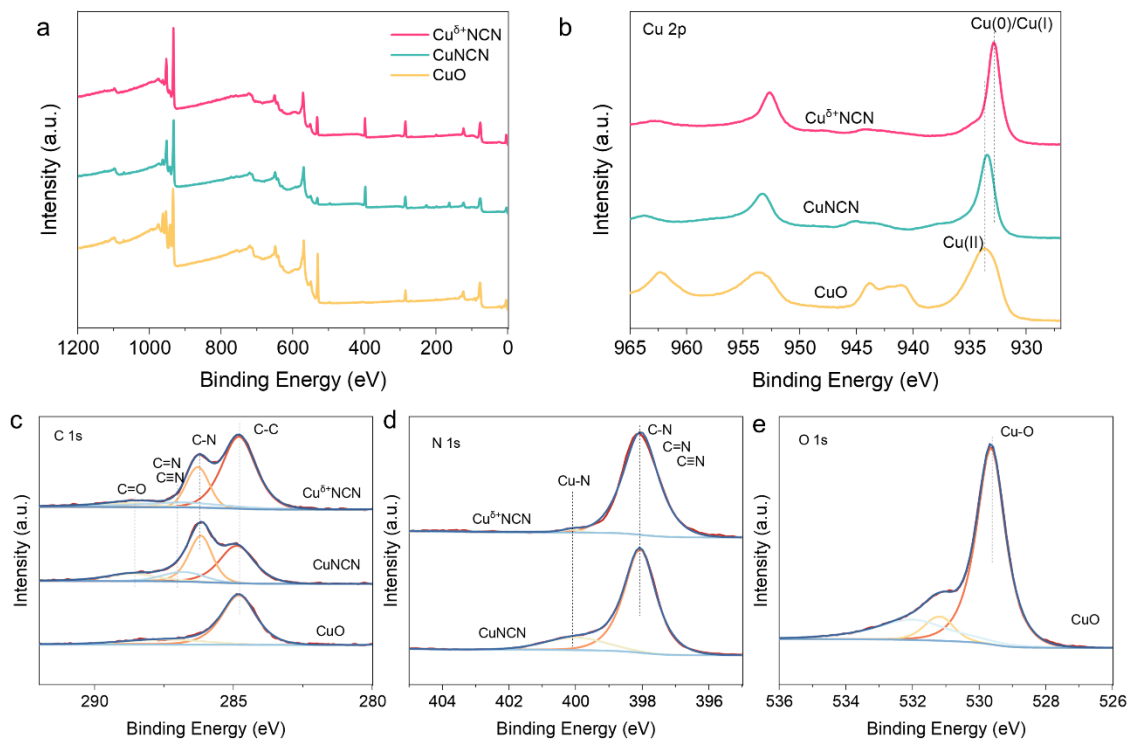

**Supplementary Fig. 5. XPS spectra of  $\text{Cu}^{\delta+}\text{NCN}$ ,  $\text{CuNCN}$  and  $\text{CuO}$ .** (a) XPS survey spectra. (b) Cu 2p, (c) C 1s high-resolution XPS of  $\text{Cu}^{\delta+}\text{NCN}$ ,  $\text{CuNCN}$  and  $\text{CuO}$ . (d) N 1s high-resolution XPS of  $\text{Cu}^{\delta+}\text{NCN}$  and  $\text{CuNCN}$ . (e) O 1s high-resolution XPS of  $\text{CuO}$ .

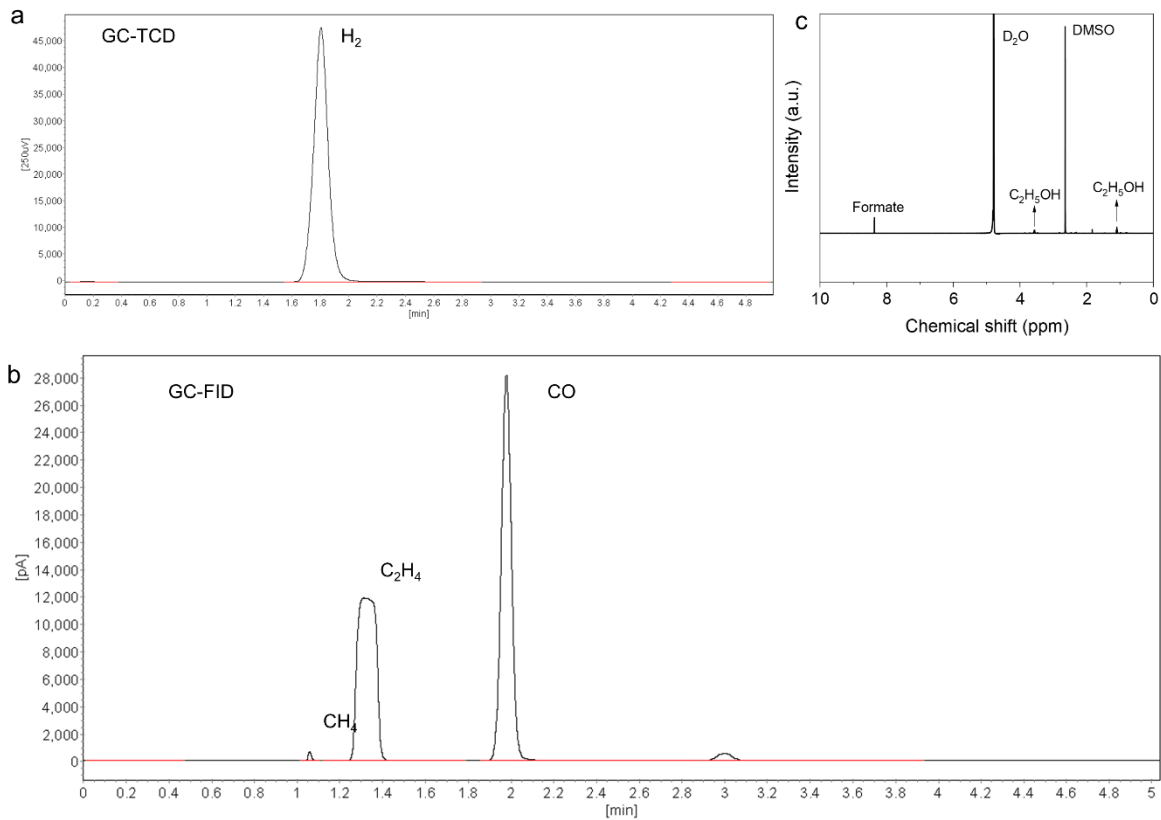

**Supplementary Fig. 6. Representative data on gas products and liquid products distributions. (a) TCD channel. (b) FID channel. (c) liquid products analysis.**

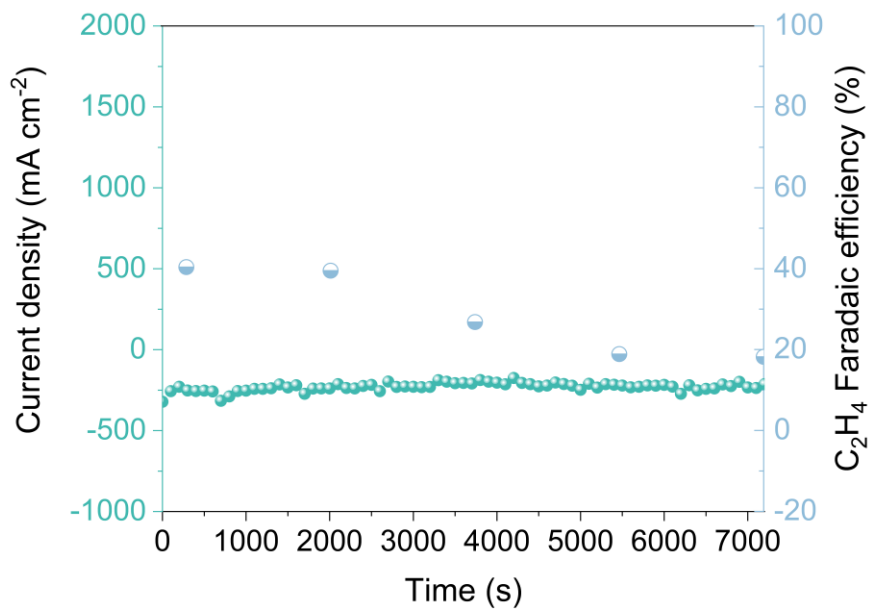

**Supplementary Fig. 7. Stability testing of CuNCN.** Performance of CuNCN in a three-electrode flow cell to produce ethylene.



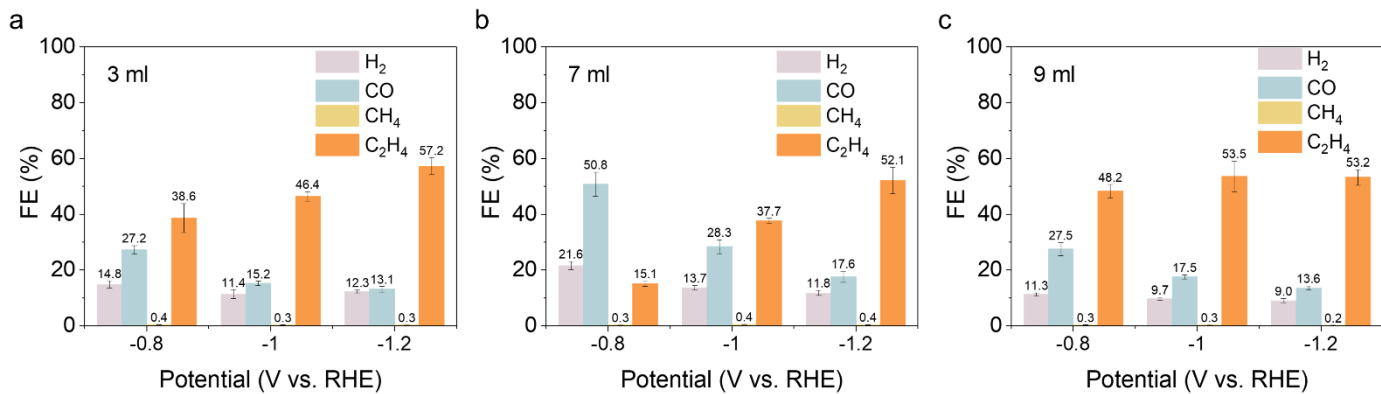

**Supplementary Fig. 8. FE of various products of Cu<sup>δ+</sup>NCN with different levels of reduction at different potentials.** (a) Add 3 ml of the reducing agent. (b) Add 7 ml of the reducing agent. (c) Add 9 ml of the reducing agent.

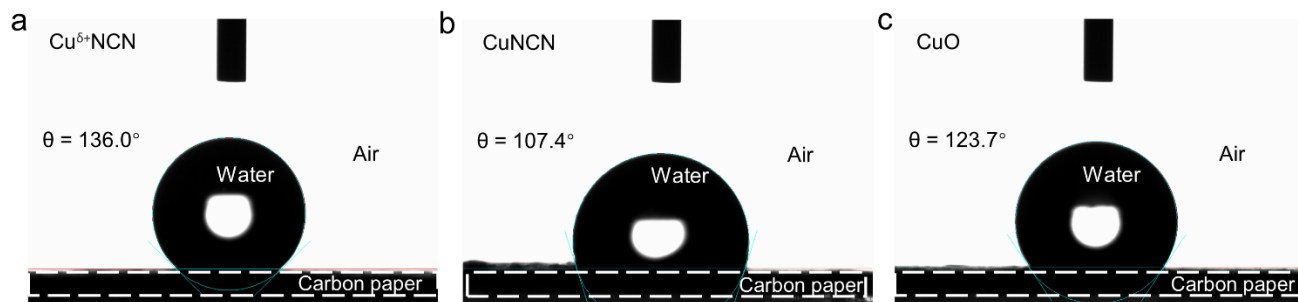

**Supplementary Fig. 9. Contact angle measurements** for (a)  $\text{Cu}^{\delta+}\text{NCN}$ , (b)  $\text{CuNCN}$  and (c)  $\text{CuO}$ .

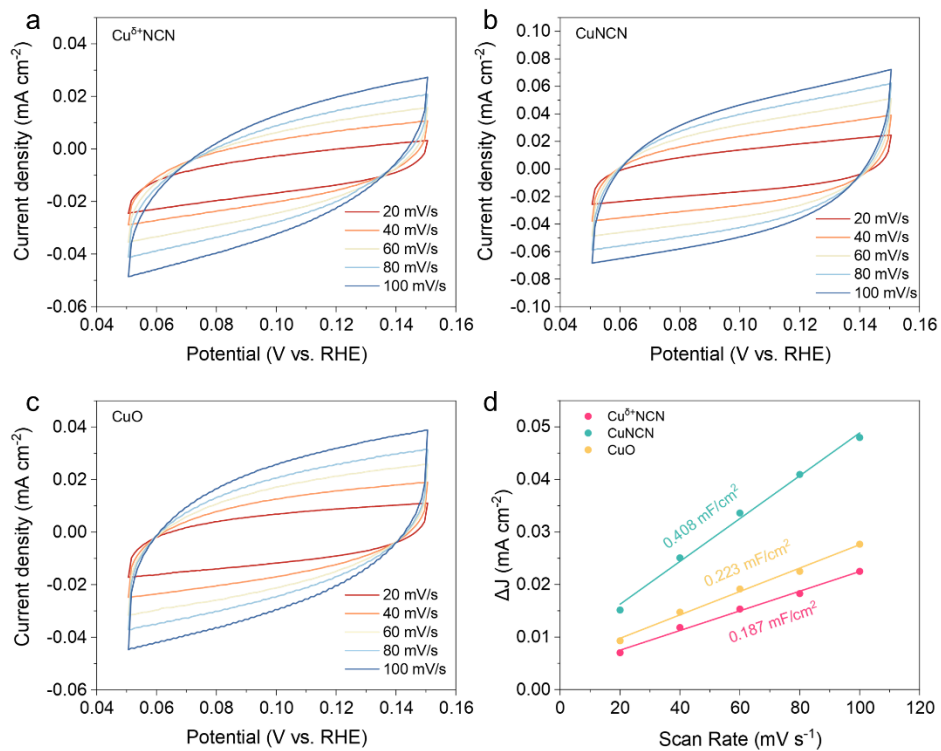

**Supplementary Fig. 10. Evaluate the electrochemically active surface area.** Cyclic voltammety curves for (a)  $\text{Cu}^{\delta+}\text{NCN}$ , (b)  $\text{CuNCN}$ , and (c)  $\text{CuO}$  at varying scan rates, along with (d) the calculated slopes from the fitting of these three samples.

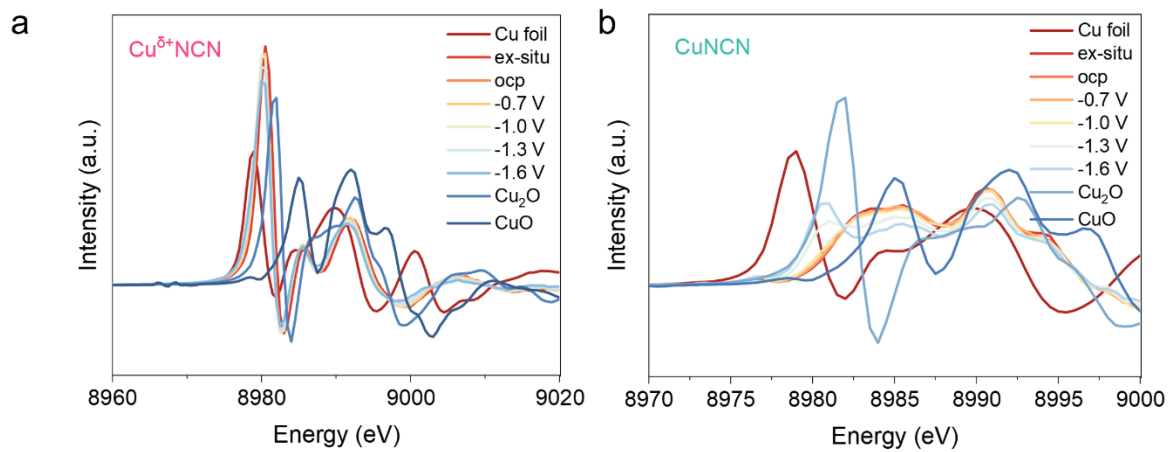

**Supplementary Fig. 11. Derived normalized  $\chi\mu(E)$  spectra of (a)  $\text{Cu}^{\delta+}\text{NCN}$  and (b) CuNCN in *operando* XANES.**

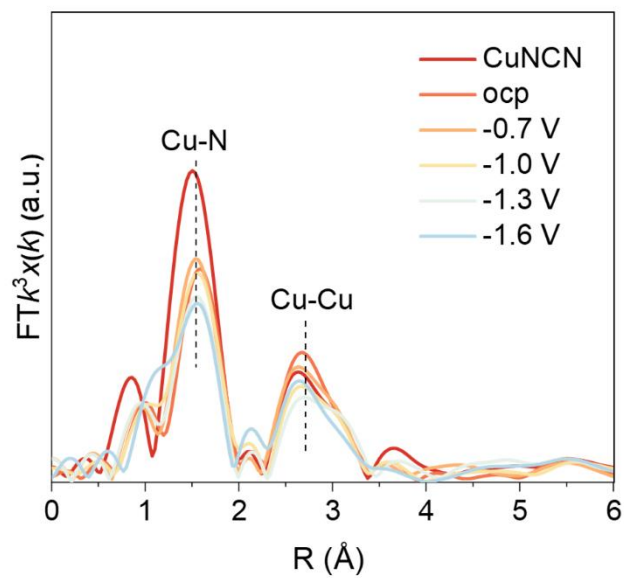

**Supplementary Fig. 12.** Fourier-transformed  $k^3$ -weighted EXAFS signals of the Cu  $K$ -edge recorded at different potentials for the  $\text{Cu}^{\delta+}\text{NCN}$ .

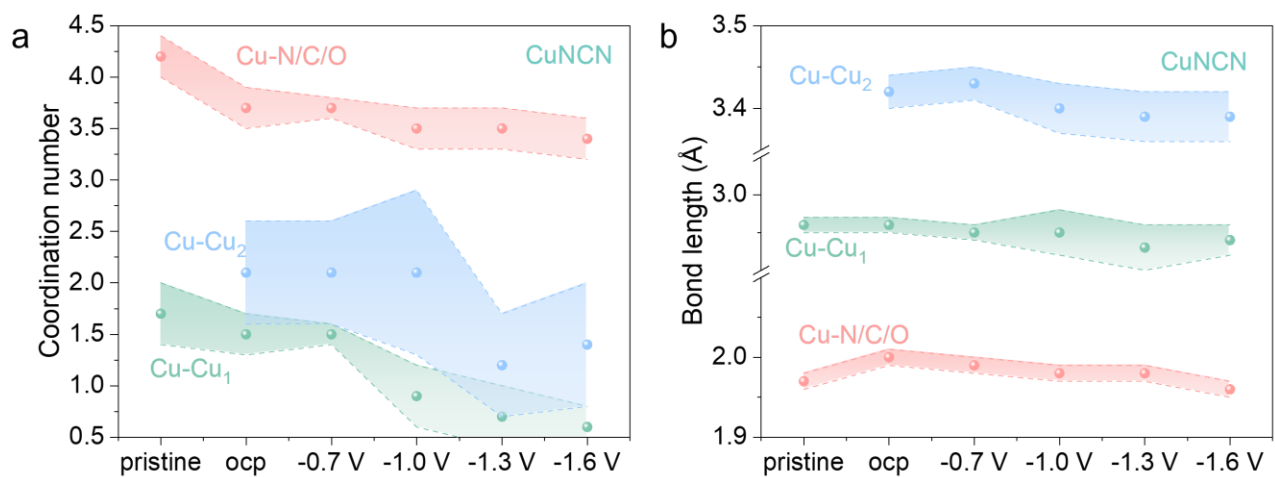

**Supplementary Fig. 13. Coordination number and bond length changes of CuNCN during the CO<sub>2</sub>RR.**

(a) Changes of coordination number for the Cu–N and Cu–Cu coordination shells. (b) Changes of bond length for the Cu–N and Cu–Cu coordination shells.

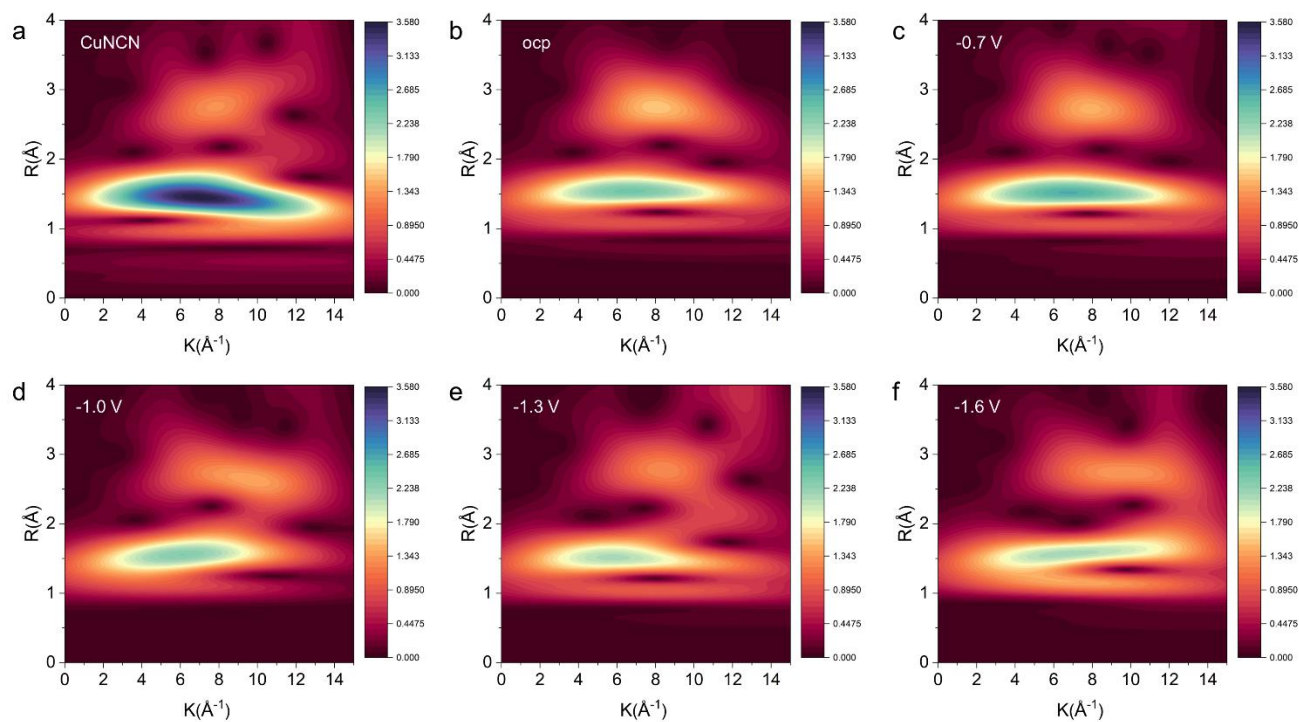

**Supplementary Fig. 14. Comparison of the EXAFS WTs of the Cu  $K$ -edge recorded during *operando* testing of the CuNCN. (a) Initial state. (b) Under open-circuit voltage. (c) At -0.7 V vs. RHE. (d) At -1.0 V vs. RHE. (e) At -1.3 V vs. RHE. (f) At -1.6 V vs. RHE.**

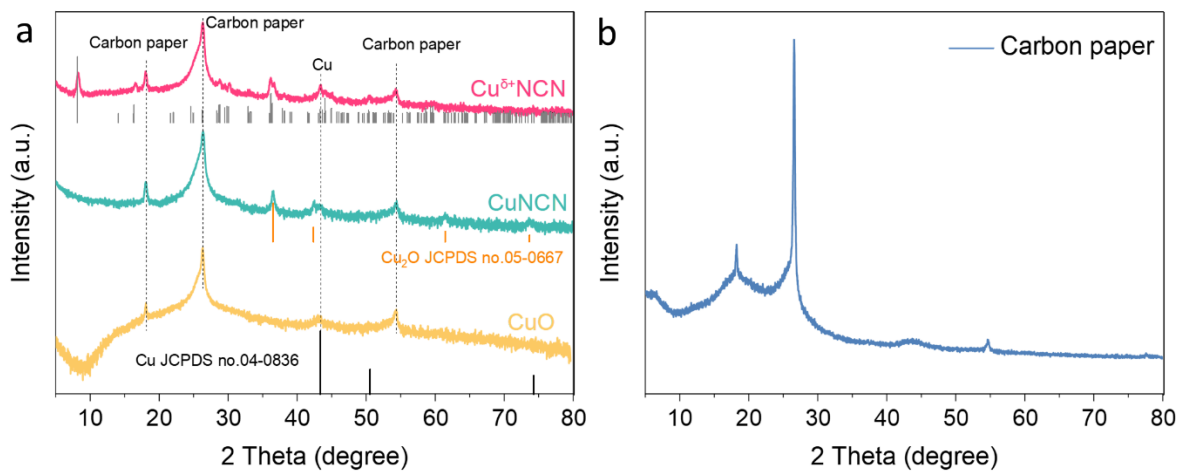

**Supplementary Fig. 15. Structure of  $\text{Cu}^{\delta+}\text{NCN}$ ,  $\text{CuNCN}$  and  $\text{CuO}$  after the  $\text{CO}_2\text{RR}$  electrolysis. (a) XRD pattern. (b) XRD pattern of the carbon paper used for the test.**



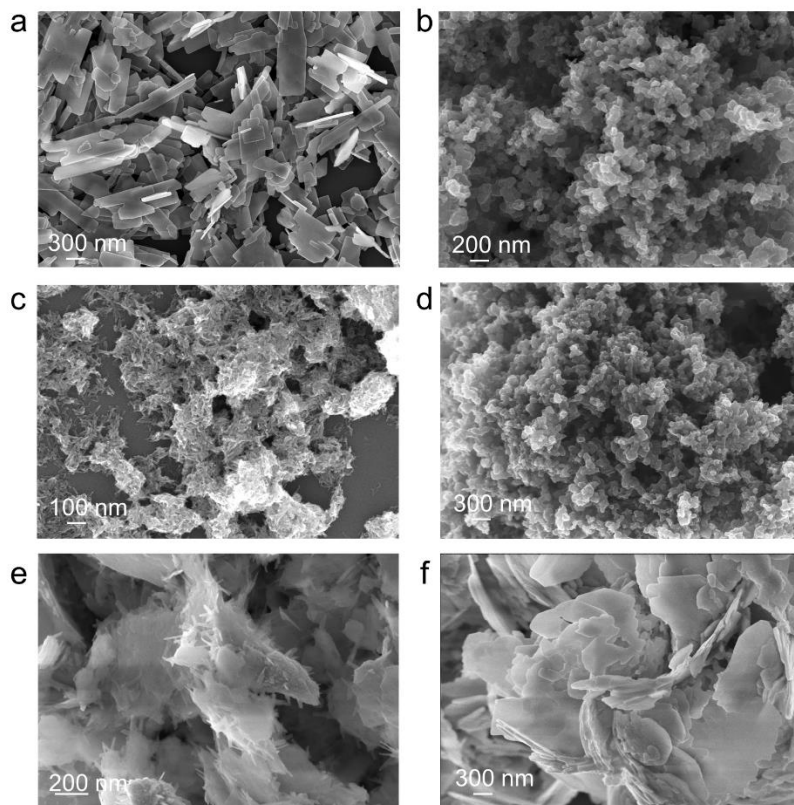

**Supplementary Fig. 16. Morphology of  $\text{Cu}^{\delta+}\text{NCN}$ ,  $\text{CuNCN}$  and  $\text{CuO}$  before and after the  $\text{CO}_2\text{RR}$  electrolysis.** (a) SEM images of the  $\text{CuO}$ . (b) SEM images of the  $\text{CuO}$  after  $\text{CO}_2\text{RR}$  process. (c) SEM images of the  $\text{CuNCN}$ . (d) SEM images of the  $\text{CuNCN}$  after  $\text{CO}_2\text{RR}$  process. (e) SEM images of the  $\text{Cu}^{\delta+}\text{NCN}$ . (f) SEM images of the  $\text{Cu}^{\delta+}\text{NCN}$  after  $\text{CO}_2\text{RR}$  process.

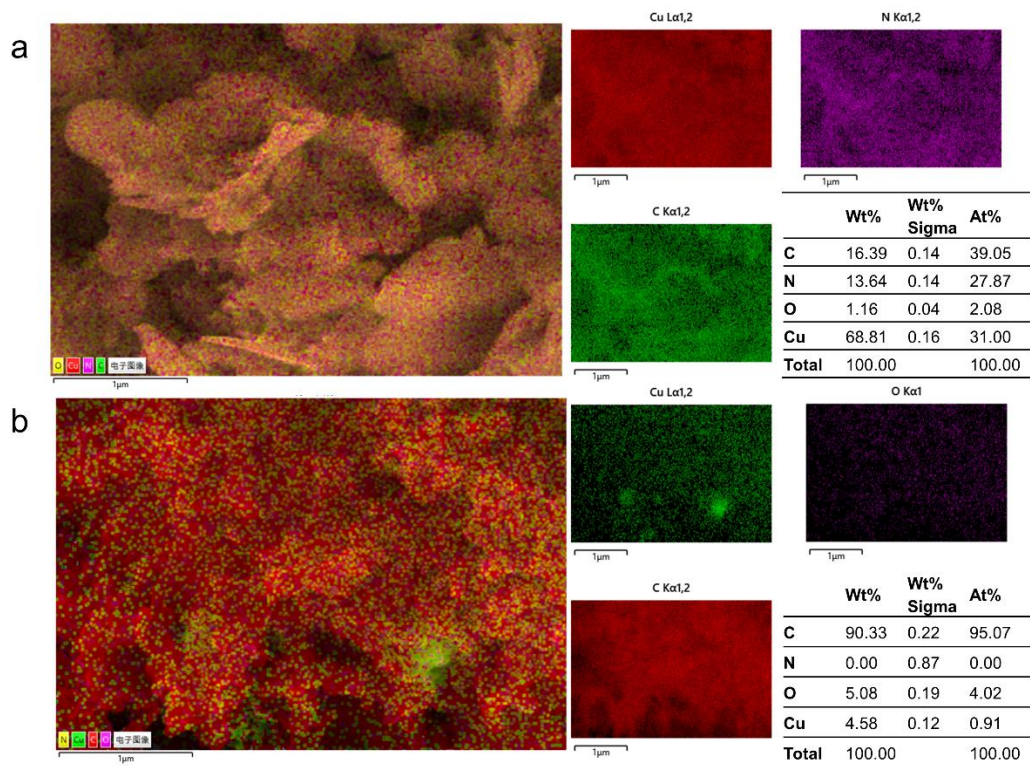

**Supplementary Fig. 17. Elemental mapping images and EDX spectra for (a)  $\text{Cu}^{\delta+}\text{NCN}$  and (b)  $\text{CuNCN}$  after  $\text{CO}_2\text{RR}$  process.**

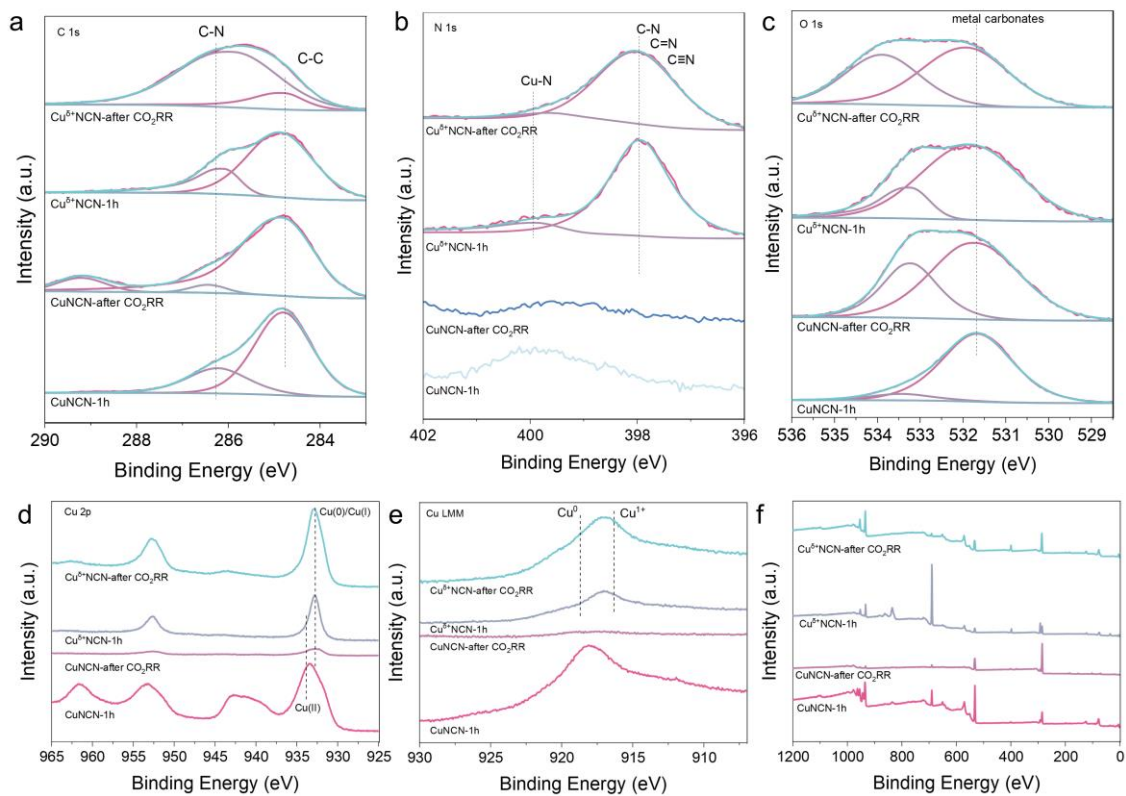

**Supplementary Fig. 18. XPS spectra of  $\text{Cu}^{\delta+}\text{NCN}$ , and  $\text{CuNCN}$  after undergoing  $\text{CO}_2\text{RR}$  for 1h and 15h, respectively. (a) C 1s high-resolution XPS. (b) N 1s high-resolution XPS. (c) O 1s high-resolution XPS. (d) Cu 2p high-resolution XPS. (e) Cu LMM spectra. (f) XPS survey spectra.**

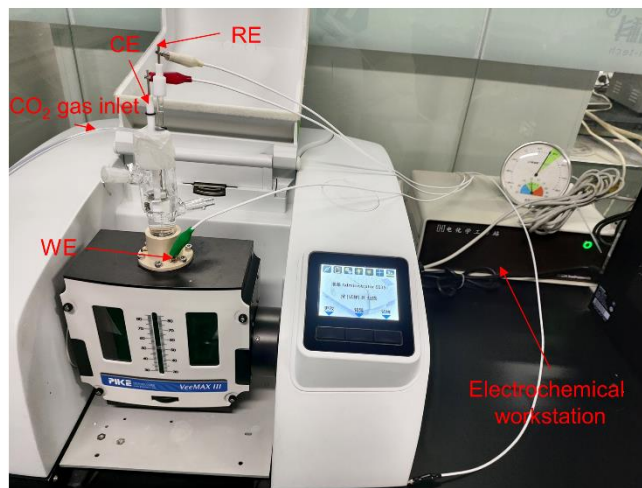

**Supplementary Fig. 19. Equipment for *operando* ATR-SEIRA spectra test equipment.** The electrolyte used is CO<sub>2</sub>-saturated KHCO<sub>3</sub>.

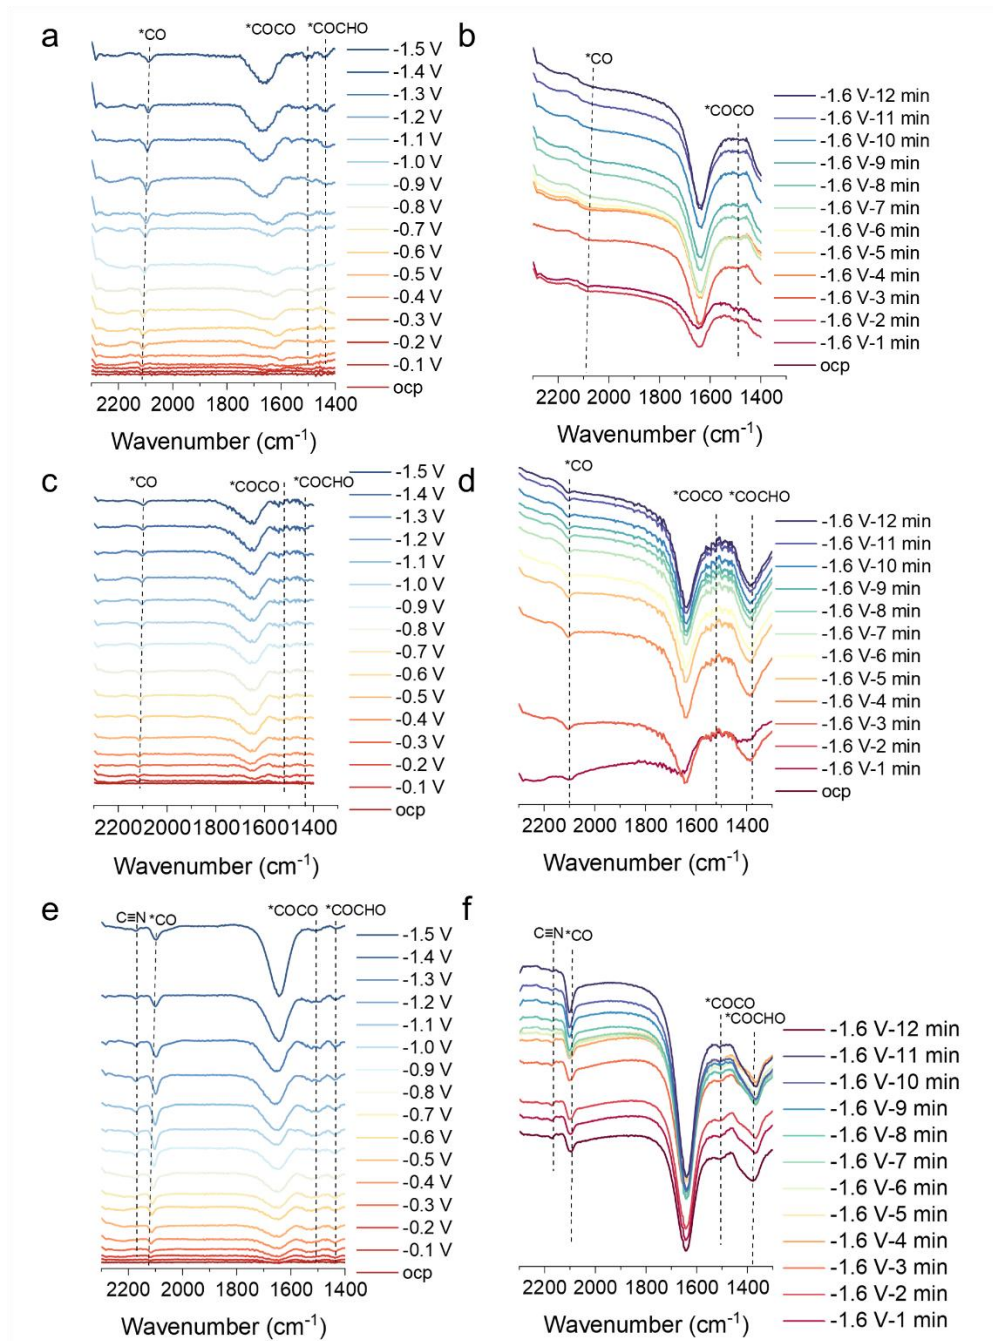

**Supplementary Fig. 20.** The *2D operando* ATR-SEIRA spectra of CO<sub>2</sub>RR of (a-b) CuO, (c-d) CuNCN, and (e-f) Cu<sup>δ+</sup>NCN.

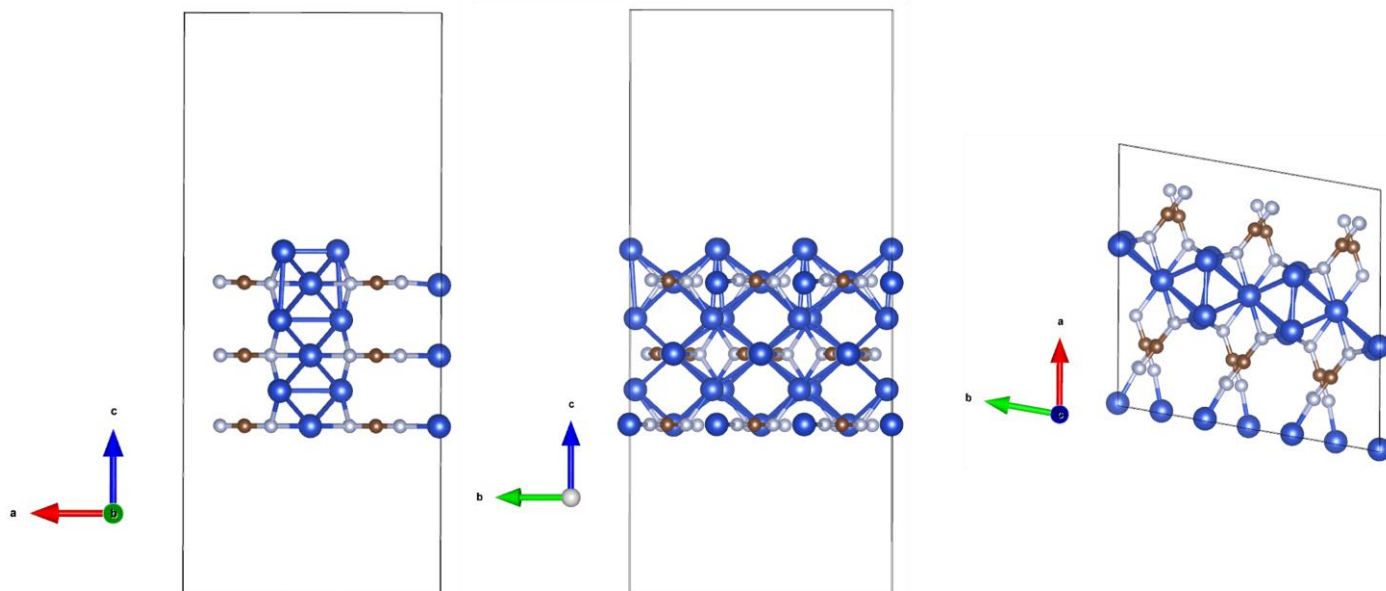

**Supplementary Fig. 21. Models of  $\text{Cu}^{\delta+}\text{NCN}$  structure.**  $\text{Cu}_2\text{NCN}$  coordinated  $\text{Cu}^0\text{-Cu}^0$  dual atoms model was used to represent the catalytic site



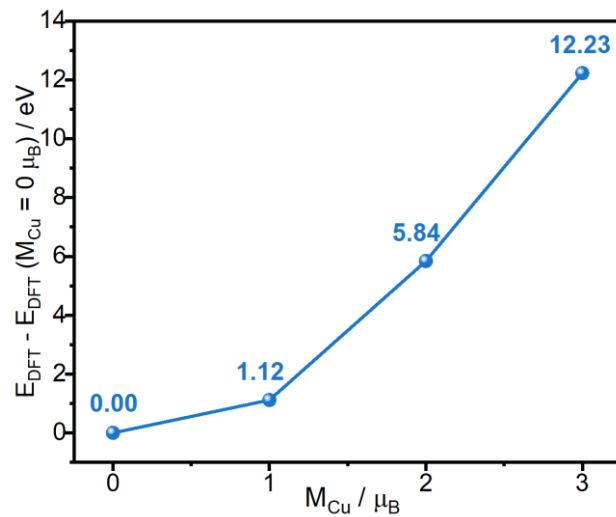

**Supplementary Fig. 22. Energy calculations under different magnetic moments.** The total energies of the  $\text{Cu}^{\delta+}\text{NCN}$  calculated with different magnetic moments of the  $\text{Cu}^0$  atoms ( $M_{\text{Cu}} = 0, 1, 2,$  and  $3 \mu_{\text{B}}$ ).

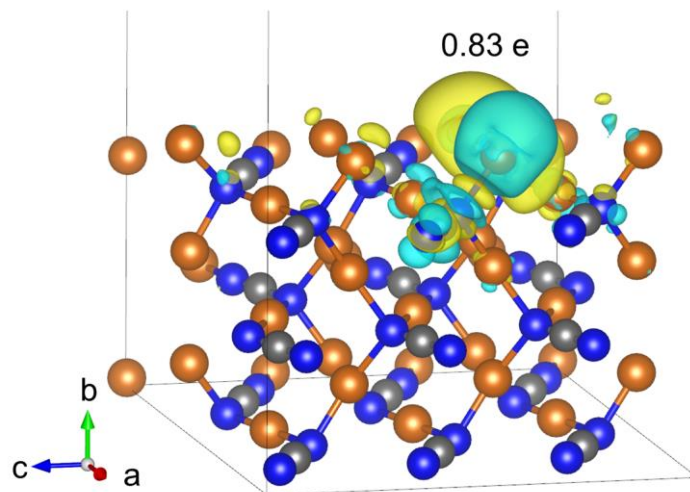

**Supplementary Fig. 23. Charge density difference plots.** The side views of the three-dimensional charge density difference plots of Cu<sup>δ+</sup>NCN.



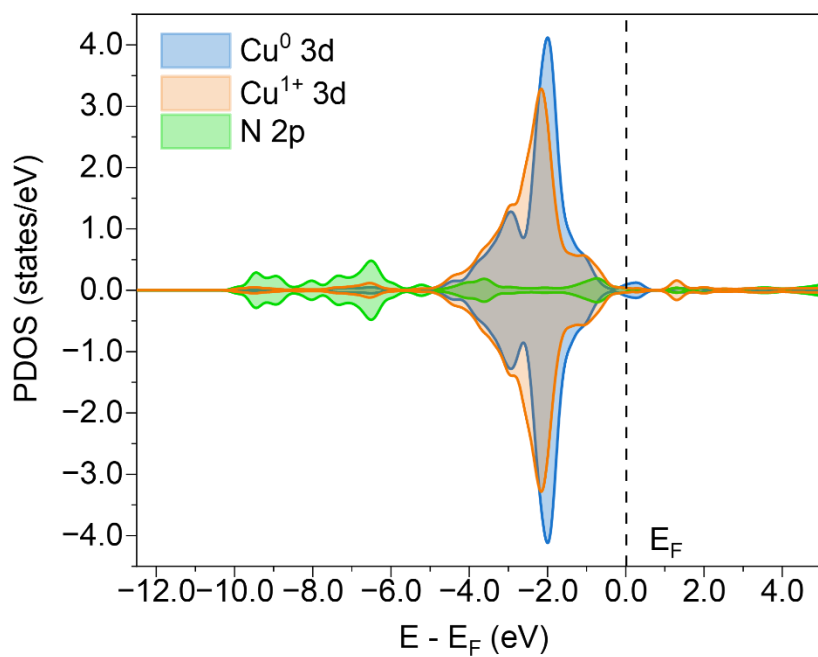

**Supplementary Fig. 24. Density of states from DFT calculations.** The calculated projected density of states results for Cu<sup>δ+</sup>NCN.

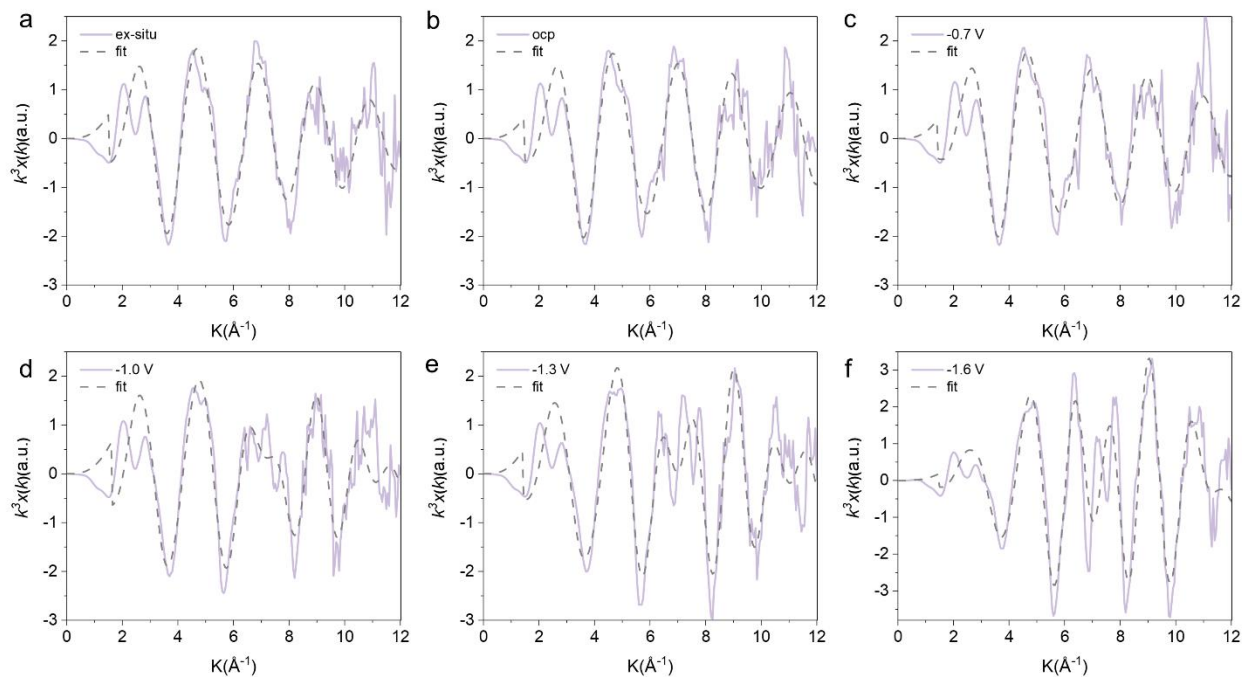

**Supplementary Fig. 25. Operando  $k^3$ -weighted Cu  $K$ -edge EXAFS spectra for  $\text{Cu}^{\delta+}\text{NCN}$  under at representative potentials.** (a) Initial state. (b) Under open-circuit voltage. (c) At -0.7 V vs. RHE. (d) At -1.0 V vs. RHE. (e) At -1.3 V vs. RHE. (f) At -1.6 V vs. RHE.

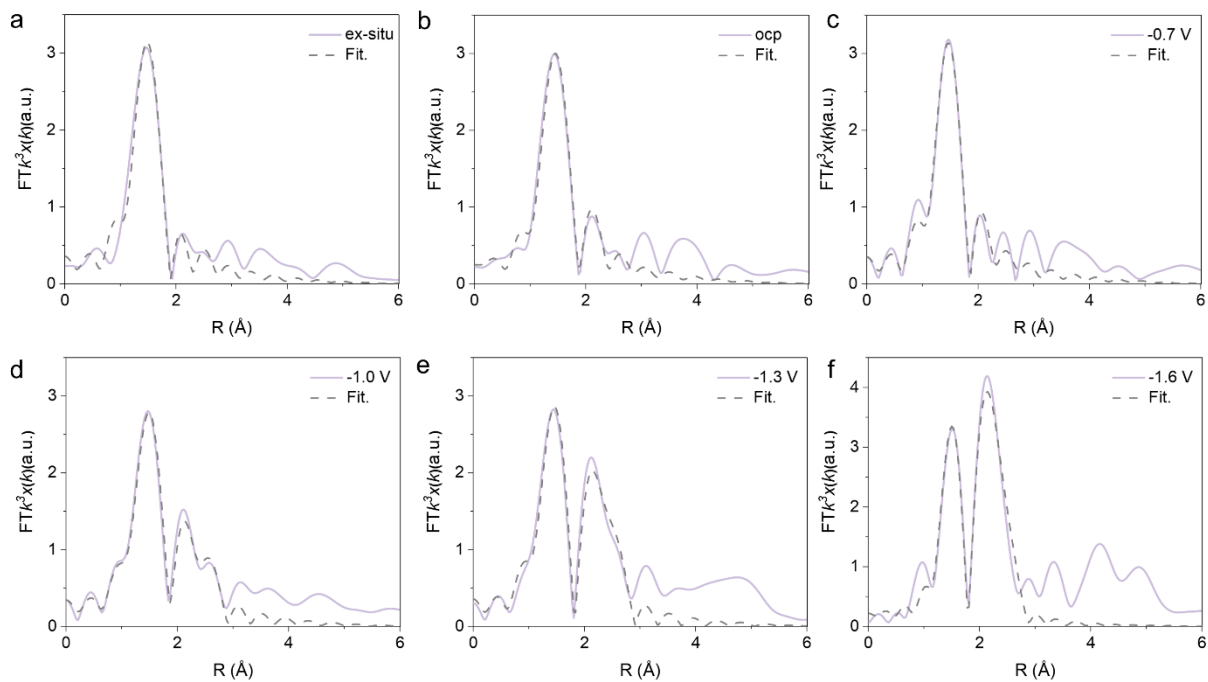

**Supplementary Fig. 26. Fourier-transformed magnitudes for  $\text{Cu}^{\delta+}\text{NCN}$  under at representative potentials.** (a) Initial state. (b) Under open-circuit voltage. (c) At -0.7 V vs. RHE. (d) At -1.0 V vs. RHE. (e) At -1.3 V vs. RHE. (f) At -1.6 V vs. RHE.

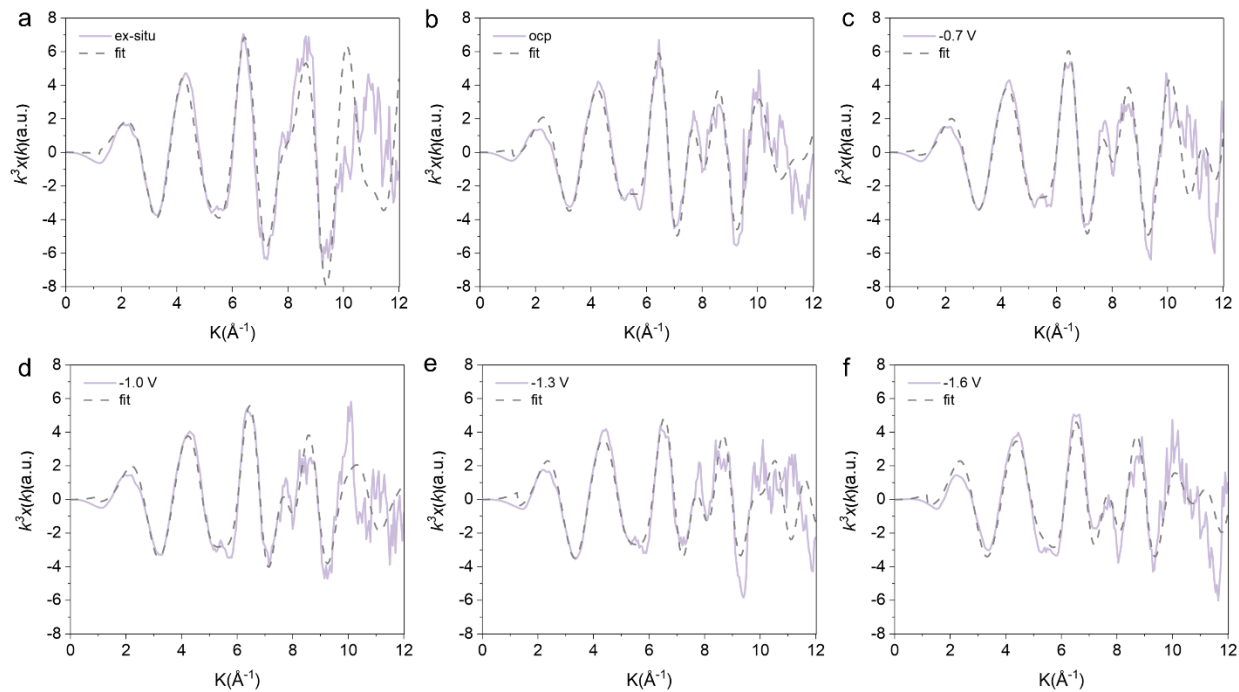

**Supplementary Fig. 27. Operando  $k^3$ -weighted Cu  $K$ -edge EXAFS spectra for CuNCN under at representative potentials.** (a) Initial state. (b) Under open-circuit voltage. (c) At -0.7 V vs. RHE. (d) At -1.0 V vs. RHE. (e) At -1.3 V vs. RHE. (f) At -1.6 V vs. RHE.

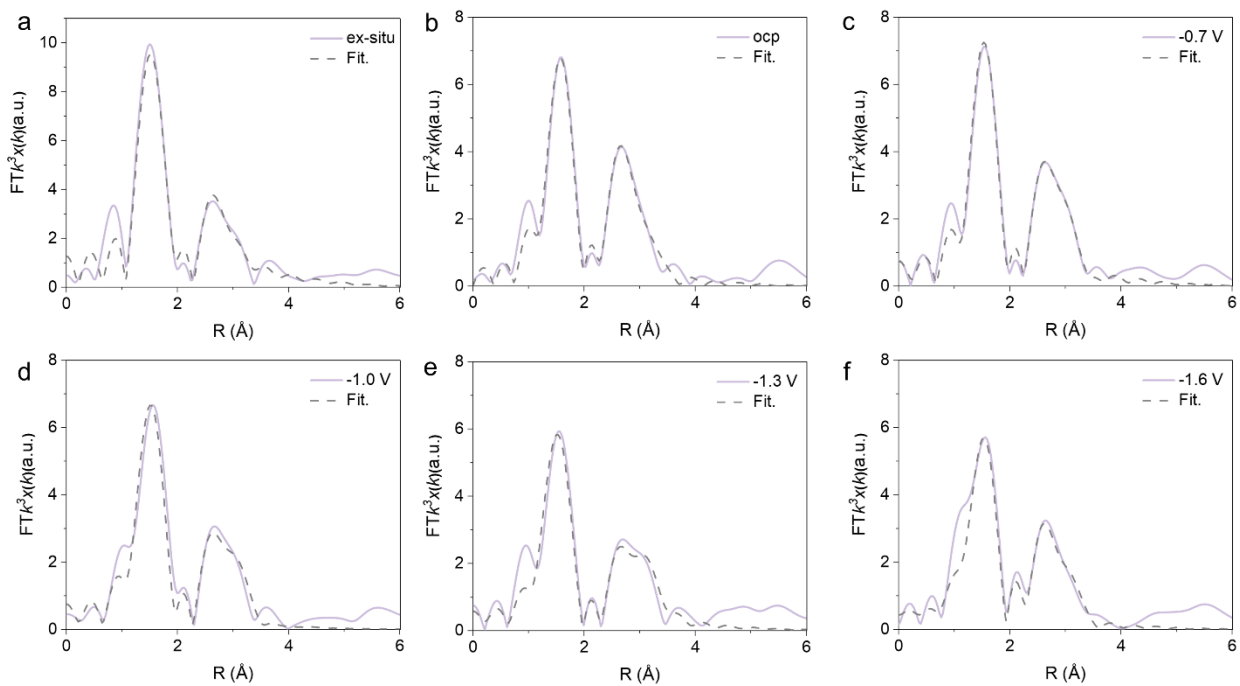

**Supplementary Fig. 28. Fourier-transformed magnitudes for CuNCN under at representative potentials.** (a) Initial state. (b) Under open-circuit voltage. (c) At -0.7 V vs. RHE. (d) At -1.0 V vs. RHE. (e) At -1.3 V vs. RHE. (f) At -1.6 V vs. RHE.

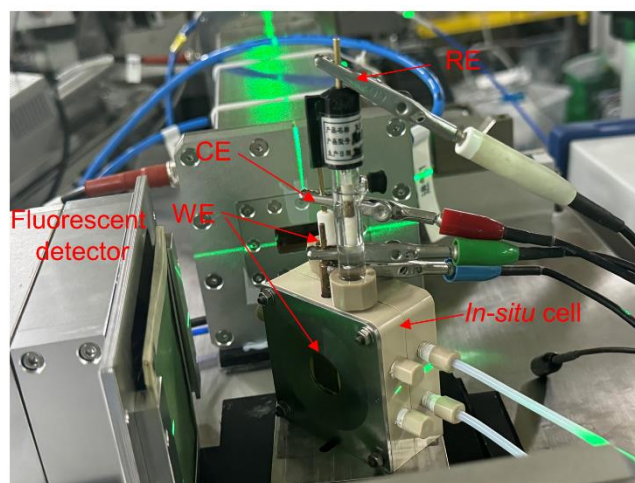

**Supplementary Fig. 29.**  $\text{Cu}^{\delta+}\text{NCN}$  and  $\text{CuNCN}$  in the *operando* XAFS testing environment for Cu *K*-edge spectra of catalysis (test beamline station is the SSRF BL17B1).

**Supplementary Table 1.** ICP-OES of the atom ratio in CuNCN and Cu<sup>δ+</sup>NCN.

| Samples              | Cu (%) |
|----------------------|--------|
| CuNCN                | 60.45% |
| Cu <sup>δ+</sup> NCN | 67.23% |

**Supplementary Table 2.** EXAFS fitting parameters for the Cu *K*-edge of the Cu<sup>δ+</sup>NCN (*S*<sub>0</sub><sup>2</sup>=0.83)

|         | shell    | CN      | R(Å)      | σ <sup>2</sup> | Δ <i>E</i> <sub>0</sub> | R factor |
|---------|----------|---------|-----------|----------------|-------------------------|----------|
| Cu foil | Cu-Cu    | 12*     | 2.54±0.01 | 0.0086         | 4.2±0.5                 | 0.0040   |
| ex-situ | Cu-N/C/O | 1.6±0.1 | 1.89±0.01 | 0.0043         | 8.7±0.9                 | 0.0113   |
| Cu-ocp  | Cu-N/C/O | 1.4±0.1 | 1.88±0.01 | 0.0028         | 8.2±1.0                 | 0.0069   |
|         | Cu-C     | 0.7±0.3 | 2.65±0.04 | 0.0032         |                         |          |
| -0.7 V  | Cu-N/C/O | 1.4±0.1 | 1.88±0.01 | 0.0030         | 8.0±0.9                 | 0.0067   |
|         | Cu-C     | 0.9±0.3 | 2.63±0.04 | 0.0088         |                         |          |
| -1.0 V  | Cu-N/C/O | 1.7±0.1 | 1.90±0.01 | 0.0065         | 9.9±1.2                 | 0.0098   |
|         | Cu-Cu    | 0.5±0.1 | 2.58±0.02 | 0.0056         |                         |          |
| -1.3 V  | Cu-N/C/O | 1.6±0.1 | 1.87±0.02 | 0.0054         | 7.9±1.7                 | 0.0177   |
|         | Cu-Cu    | 0.9±0.2 | 2.58±0.02 | 0.0071         |                         |          |
| -1.6 V  | Cu-N/C/O | 1.1±0.1 | 1.88±0.01 | 0.0010         | 8.2±1.5                 | 0.0131   |
|         | Cu-Cu    | 1.6±0.2 | 2.57±0.01 | 0.0085         |                         |          |
|         | Cu-N/C/O | 1.4±0.3 | 2.52±0.03 | 0.0037         |                         |          |

<sup>a</sup>*N*: coordination numbers; <sup>b</sup>*R*: bond distance; <sup>c</sup>σ<sup>2</sup>: Debye-Waller factors; <sup>d</sup> Δ*E*<sub>0</sub>: the inner potential correction. *R* factor: goodness of fit.



**Supplementary Table 3.** EXAFS fitting parameters for the Cu *K*-edge of the CuNCN ( $S_0^2=0.83$ )

|         | shell    | CN      | R(Å)      | $\sigma^2$ | $\Delta E_0$ | R factor |
|---------|----------|---------|-----------|------------|--------------|----------|
| Cu foil | Cu-Cu    | 12*     | 2.54±0.01 | 0.0086     | 4.2±0.5      | 0.0040   |
| ex-situ | Cu-N/C/O | 4.2±0.2 | 1.97±0.01 | 0.0001     | 5.9±0.8      | 0.0103   |
|         | Cu-Cu1   | 1.7±0.3 | 2.96±0.01 | 0.0033     |              |          |
| Cu-ocp  | Cu-N/C/O | 3.7±0.2 | 2.00±0.01 | 0.0031     | 5.2±0.9      | 0.0081   |
|         | Cu-Cu1   | 1.5±0.2 | 2.96±0.01 | 0.0045     |              |          |
|         | Cu-Cu2   | 2.1±0.5 | 3.42±0.02 | 0.0085     |              |          |
| -0.7 V  | Cu-N/C/O | 3.7±0.1 | 1.99±0.01 | 0.0023     | 3.9±0.6      | 0.0055   |
|         | Cu-Cu1   | 1.5±0.1 | 2.95±0.01 | 0.0001     |              |          |
|         | Cu-Cu2   | 2.1±0.5 | 3.43±0.02 | 0.0081     |              |          |
| -1.0 V  | Cu-N/C/O | 3.5±0.2 | 1.98±0.01 | 0.0035     | 3.0±1.0      | 0.0171   |
|         | Cu-Cu1   | 0.9±0.3 | 2.95±0.03 | 0.0083     |              |          |
|         | Cu-Cu2   | 2.1±0.8 | 3.40±0.03 | 0.0081     |              |          |
| -1.3 V  | Cu-N/C/O | 3.5±0.2 | 1.98±0.01 | 0.0045     | 6.0±1.1      | 0.0171   |
|         | Cu-Cu1   | 0.7±0.3 | 2.93±0.03 | 0.0026     |              |          |
|         | Cu-Cu2   | 1.2±0.5 | 3.39±0.03 | 0.0001     |              |          |
| -1.6 V  | Cu-N/C/O | 3.4±0.2 | 1.96±0.01 | 0.0055     | 5.4±1.2      | 0.0114   |
|         | Cu-Cu1   | 0.6±0.2 | 2.94±0.02 | 0.0001     |              |          |
|         | Cu-Cu2   | 1.4±0.6 | 3.39±0.03 | 0.0070     |              |          |

<sup>a</sup>*N*: coordination numbers; <sup>b</sup>*R*: bond distance; <sup>c</sup> $\sigma^2$ : Debye-Waller factors; <sup>d</sup>  $\Delta E_0$ : the inner potential correction. *R* factor: goodness of fit.

**Supplementary Table 4.** Performance comparison of state-of-the-art catalysts for CO<sub>2</sub>RR to C<sub>2</sub>H<sub>4</sub> reported in the literature.

| Catalyst                  | Potential<br>(V vs. RHE) | FE<br>(%)   | Current density<br>(mA cm <sup>-2</sup> ) | Stability<br>(h) | Reference                                  |
|---------------------------|--------------------------|-------------|-------------------------------------------|------------------|--------------------------------------------|
| <b>Cu<sup>δ+</sup>NCN</b> | <b>-1.4</b>              | <b>77.7</b> | <b>400</b>                                | <b>15</b>        | <b>This work</b>                           |
|                           | <b>3.6*</b>              | <b>66.8</b> | <b>180</b>                                | <b>78</b>        |                                            |
| <b>Cu</b>                 | 4.2*                     | 25          | 1200                                      | 12               | Science 2021, 372, 1074                    |
| <b>Cu-Al</b>              | ~-1.7                    | 75±4        | 400                                       | 100              | Nature 2020, 581, 178                      |
| <b>Cu-P1</b>              | -0.99                    | 72          | 400                                       | /                | Nat Catal., 2021, 4, 20                    |
| <b>A-CuNWs</b>            | -1.0±0.01                | ~77.4       | 17.3                                      | 200              | Nat. Catal., 2020, 3, 804                  |
| <b>F-Cu</b>               | ~-0.6                    | 80          | 320                                       | 40               | Nat. Catal. 2020, 3, 478–487               |
| <b>cAA-CuNW</b>           | -1.27                    | 60.7        | 539                                       | /                | Nat Commun. 2024, 15, 192                  |
| <b>CuPO</b>               | ~-1.7                    | ~48         | 300                                       | 18               | Nat. Commun., 2023, 14, 7681               |
| <b>Ni SAC+Cu-R</b>        | -1.4                     | 60          | 500                                       | 14               | J. Am. Chem. Soc. 2024, 146, 468           |
| <b>PcCu-Cu-O</b>          | ~-1.2                    | 50          | 7.3                                       | 4                | J. Am. Chem. Soc. 2021, 143, 7242          |
| <b>GB-Cu</b>              | -1.2                     | 40          | ~52                                       | 3                | J. Am. Chem. Soc. 2020, 142, 6878          |
| <b>Cu-S motifs</b>        | ~-1.2                    | ~50         | 150                                       | 8                | Angew. Chem. Int. Ed. 2022, 61, e202111700 |
| <b>Cu<sub>3-x</sub></b>   | -0.7                     | 55.01       | 129.58                                    | 9                | Angew. Chem. Int. Ed. 2021, 60, 26210      |
| <b>TA-Cu</b>              | 3.35*                    | 50          | 500 <sub>total</sub>                      | 10               | Angew. Chem. 2023, 135, e202315621         |
| <b>Mg-Cu</b>              | ~-0.75                   | 70          | 455                                       | 48               | Angew. Chem. Int. Ed. 2022, 61, e202213423 |

\* Represents the electrolyser voltage in the MEA system.

**Supplementary Table 5.** Reaction paths of the intermediates involved in the reaction at  $U = -0.8$  V and reaction energies, with the corresponding kinetic potentials for the key reaction steps in parentheses

| Reactive species     | Reaction process                                                       | Reaction products    | Free energy change |
|----------------------|------------------------------------------------------------------------|----------------------|--------------------|
| *(sub)               | +CO <sub>2</sub>                                                       | *CO <sub>2</sub>     | 0.23               |
| *CO <sub>2</sub>     | +2(H <sup>+</sup> + e <sup>-</sup> )-H <sub>2</sub> O                  | *CO                  | -1.68              |
| *CO                  | +CO <sub>2</sub> +2(H <sup>+</sup> + e <sup>-</sup> )-H <sub>2</sub> O | 2*CO                 | -0.96              |
| 2*CO                 | *CO dimerization                                                       | *COCO                | -0.01 (0.86)       |
| *COCO                | + H <sup>+</sup> + e <sup>-</sup>                                      | *COCO <sub>H</sub>   | -1.28              |
|                      |                                                                        | *COCO <sub>H</sub> O | -1.45              |
| *COCO <sub>H</sub> O | +3(H <sup>+</sup> + e <sup>-</sup> )-H <sub>2</sub> O                  | *CHCO <sub>H</sub>   | -3.80              |
| *CHCO <sub>H</sub>   | + H <sup>+</sup> + e <sup>-</sup>                                      | *CHCHO <sub>H</sub>  | -0.68 (1.07)       |
|                      | + H <sup>+</sup> + e <sup>-</sup> -H <sub>2</sub> O                    | *CHC                 | -1.02 (0.64)       |

**Supplementary Table 6.** The crystallographic information file (.CIF) for Cu<sup>δ+</sup>NCN sample.

data\_ Cu<sup>δ+</sup>NCN -surface:

\_cell\_length\_a 11.2339

\_cell\_length\_b 11.4027

\_cell\_length\_c 25

\_cell\_angle\_alpha 90.002

\_cell\_angle\_beta 90.0007

\_cell\_angle\_gamma 80.2593

loop\_

\_symmetry\_equiv\_pos\_as\_xyz

+x,+y,+z

loop\_

\_atom\_site\_type\_symbol

\_atom\_site\_label

\_atom\_site\_fract\_x

\_atom\_site\_fract\_y

\_atom\_site\_fract\_z

|   |   |            |            |            |
|---|---|------------|------------|------------|
| C | C | 0.76270308 | 0.81000504 | 0.28933427 |
| C | C | 0.76270308 | 0.47667171 | 0.28933427 |
| C | C | 0.76270308 | 0.14333838 | 0.28933427 |
| C | C | 0.25208284 | 0.19003512 | 0.28933615 |
| C | C | 0.25208284 | 0.85670178 | 0.28933615 |
| C | C | 0.25208284 | 0.52336845 | 0.28933615 |
| C | C | 0.25193203 | 0.89587968 | 0.41066943 |
| C | C | 0.25193203 | 0.22921301 | 0.41066943 |
| C | C | 0.25193203 | 0.56254635 | 0.41066943 |
| C | C | 0.76285392 | 0.10416404 | 0.41067166 |
| C | C | 0.76285392 | 0.77083071 | 0.41067166 |
| C | C | 0.76285392 | 0.43749737 | 0.41067166 |
| C | C | 0.76497885 | 0.48019893 | 0.53580721 |
| C | C | 0.76497887 | 0.81348673 | 0.53580606 |
| C | C | 0.76498147 | 0.14685214 | 0.53581973 |
| C | C | 0.24981291 | 0.18657136 | 0.53580292 |
| C | C | 0.24980690 | 0.85322201 | 0.53581669 |
| C | C | 0.24982101 | 0.51983759 | 0.53580815 |
| N | N | 0.66038462 | 0.88101430 | 0.28933399 |
| N | N | 0.66038462 | 0.54768097 | 0.28933399 |
| N | N | 0.66038462 | 0.21434764 | 0.28933399 |
| N | N | 0.85619565 | 0.41099891 | 0.28933497 |
| N | N | 0.85619565 | 0.74433224 | 0.28933497 |
| N | N | 0.85619565 | 0.07766557 | 0.28933497 |
| N | N | 0.15858489 | 0.25569938 | 0.28933546 |
| N | N | 0.15858489 | 0.58903272 | 0.28933546 |
| N | N | 0.15858489 | 0.92236605 | 0.28933546 |
| N | N | 0.35440207 | 0.11902761 | 0.28933643 |

|    |    |            |            |            |
|----|----|------------|------------|------------|
| N  | N  | 0.35440207 | 0.78569428 | 0.28933643 |
| N  | N  | 0.35440207 | 0.45236095 | 0.28933643 |
| N  | N  | 0.35448101 | 0.59905507 | 0.41066942 |
| N  | N  | 0.35448101 | 0.93238840 | 0.41066942 |
| N  | N  | 0.35448101 | 0.26572173 | 0.41066942 |
| N  | N  | 0.15818609 | 0.19525018 | 0.41067028 |
| N  | N  | 0.15818609 | 0.86191685 | 0.41067028 |
| N  | N  | 0.15818609 | 0.52858352 | 0.41067028 |
| N  | N  | 0.85659371 | 0.47147126 | 0.41067080 |
| N  | N  | 0.85659371 | 0.80480460 | 0.41067080 |
| N  | N  | 0.85659371 | 0.13813793 | 0.41067080 |
| N  | N  | 0.66030559 | 0.06765255 | 0.41067165 |
| N  | N  | 0.66030559 | 0.40098588 | 0.41067165 |
| N  | N  | 0.66030559 | 0.73431922 | 0.41067165 |
| N  | N  | 0.66245762 | 0.55006573 | 0.53428640 |
| N  | N  | 0.66246356 | 0.21672361 | 0.53430415 |
| N  | N  | 0.66244320 | 0.88335102 | 0.53429992 |
| N  | N  | 0.85952235 | 0.41602107 | 0.53688867 |
| N  | N  | 0.85953037 | 0.74932662 | 0.53687600 |
| N  | N  | 0.85951572 | 0.08267098 | 0.53690924 |
| N  | N  | 0.15527001 | 0.25074205 | 0.53687522 |
| N  | N  | 0.15526686 | 0.91740098 | 0.53690136 |
| N  | N  | 0.15527240 | 0.58399987 | 0.53688752 |
| N  | N  | 0.35233251 | 0.11670304 | 0.53429238 |
| N  | N  | 0.35233858 | 0.44997149 | 0.53429210 |
| N  | N  | 0.35231279 | 0.78332450 | 0.53429964 |
| Cu | Cu | 0.50739408 | 0.83335250 | 0.28933520 |
| Cu | Cu | 0.50739408 | 0.50001917 | 0.28933520 |
| Cu | Cu | 0.50739408 | 0.16668584 | 0.28933520 |
| Cu | Cu | 0.00738963 | 0.00001698 | 0.28933523 |
| Cu | Cu | 0.00738963 | 0.66668364 | 0.28933523 |
| Cu | Cu | 0.00738963 | 0.33335031 | 0.28933523 |
| Cu | Cu | 0.38808049 | 0.68681159 | 0.35000834 |
| Cu | Cu | 0.38808049 | 0.35347826 | 0.35000834 |
| Cu | Cu | 0.38808049 | 0.02014493 | 0.35000834 |
| Cu | Cu | 0.62671314 | 0.31322903 | 0.35000836 |
| Cu | Cu | 0.62671314 | 0.64656237 | 0.35000836 |
| Cu | Cu | 0.62671314 | 0.97989570 | 0.35000836 |
| Cu | Cu | 0.00738948 | 0.50002605 | 0.41067052 |
| Cu | Cu | 0.00738948 | 0.83335938 | 0.41067052 |
| Cu | Cu | 0.00738948 | 0.16669272 | 0.41067052 |
| Cu | Cu | 0.50739414 | 0.50002200 | 0.41067055 |
| Cu | Cu | 0.50739414 | 0.16668867 | 0.41067055 |
| Cu | Cu | 0.50739414 | 0.83335534 | 0.41067055 |
| Cu | Cu | 0.62643201 | 0.64631576 | 0.47194993 |
| Cu | Cu | 0.62645210 | 0.31299845 | 0.47195974 |
| Cu | Cu | 0.62646471 | 0.97963652 | 0.47195568 |

|    |    |            |            |            |
|----|----|------------|------------|------------|
| Cu | Cu | 0.38834667 | 0.02041064 | 0.47195071 |
| Cu | Cu | 0.38833437 | 0.68703164 | 0.47195720 |
| Cu | Cu | 0.38836104 | 0.35373246 | 0.47194792 |
| Cu | Cu | 0.50736731 | 0.83333665 | 0.53412241 |
| Cu | Cu | 0.50739928 | 0.50001096 | 0.53410469 |
| Cu | Cu | 0.50740329 | 0.16669763 | 0.53411126 |
| Cu | Cu | 0.00738277 | 0.00003487 | 0.53189682 |
| Cu | Cu | 0.00741344 | 0.66665125 | 0.53188125 |
| Cu | Cu | 0.00741063 | 0.33340002 | 0.53187367 |
| Cu | Cu | 0.40212808 | 0.33627201 | 0.58972725 |
| Cu | Cu | 0.40206599 | 0.66955893 | 0.58969650 |
| Cu | Cu | 0.40207584 | 0.00292961 | 0.58968817 |
| Cu | Cu | 0.61272646 | 0.33048898 | 0.58972441 |
| Cu | Cu | 0.61270882 | 0.99711956 | 0.58969732 |
| Cu | Cu | 0.61268631 | 0.66375833 | 0.58970980 |
